# Supplementary material for: Multiwavelength, aerosol lidars at Maïdo supersite, Reunion Island, France: instruments description, data processing chain and quality assessment
Source: Copernicus journal article supplement (doi:10.5194/essd-2024-93), 2024-05-14
Supplement: Supplementary file [file essd-2024-93-AC2-supplement.pdf]

|                          | Relative Mean Bias Error | Linear Regression Slope | Correlation coefficient |
|--------------------------|--------------------------|-------------------------|-------------------------|
| <b>sAOD</b>              | - 7.59 %                 | 0.92                    | $0.92 \pm 0.0047$       |
| <b>Ångström exponent</b> | - 6.55 %                 | 0.88                    | $0.90 \pm 0.1283$       |

**Table 2: Intercomparison between the three instruments in terms of sAOD and Ångström exponent.**

| Time-series                               | Li1200          |                            | LiO3S           | LiO3T                                 |                  |
|-------------------------------------------|-----------------|----------------------------|-----------------|---------------------------------------|------------------|
|                                           | In 2013-2017    | 2017-ongoing               | 2013-current    | In 2013-2017                          | 2017-ongoing     |
| Elastic reception channels (nm)           | 355H, 355M      | + 355L, 355VL              | 355H, 355M      | Elastic // 532<br>Elastic $\perp$ 532 | + 532H           |
| Geometrical form factor correction method | -               | From vertical measurements | -               | -                                     | -                |
| Polarization calibration method           | -               |                            | -               | Rayleigh method                       | 3 signals method |
| Inversion method                          | Klett           |                            |                 |                                       |                  |
| Vertical resolution range (km)            | 0.030 – 0.522   | 0.015 – 0.522              | 0.030 – 0.261   | 0.052 – 0.522                         |                  |
| Detection lower bound (km)                | 10              | 3                          | 10              | 3                                     | 10               |
| Detection upper bound (km)                | 45              | 45                         | 40              | 25                                    | 35               |
| Uncertainty averaged lowest values (%)    | 50.3 $\pm$ 29.0 |                            | 64.4 $\pm$ 31.6 | 69.1 $\pm$ 42.7                       |                  |

**Table 3: Summary of the processing method and area of validity for the Level 2 products.**
